# Supplementary material
Source: MDPI journal article supplement (https://www.mdpi.com/2073-4395/13/11/2830)
Supplement: s1 [file s1 › agronomy-2710843-supplementary.pdf]

# Supplementary File

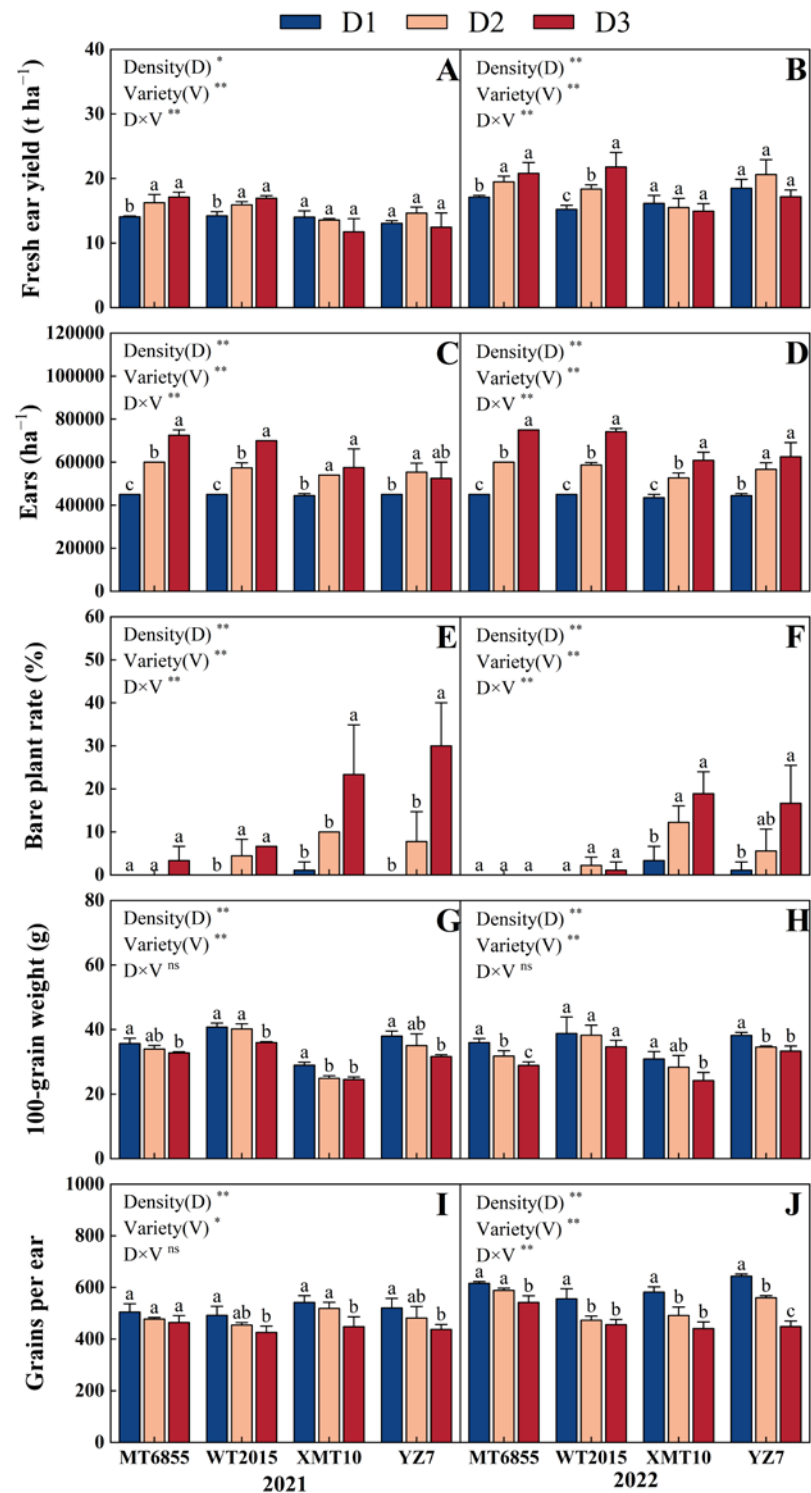

**Figure S1.** Fresh ear yield (A, B), ears (C, D), bare plant rate (E, F), 100-grain weight (G, H), and grains per ear (I, J) of sweet maize varieties MT6855, WT2015, XMT10, and YZ7 under different plant densities in 2021 and 2022. D1, D2, and D3 indicate 4.5 plants m<sup>-2</sup>, 6.0 plants m<sup>-2</sup>, and 7.5 plants m<sup>-2</sup>, respectively. Values with the same letters are not significantly different at  $p < 0.05$ , \* and \*\* indicate significant difference at  $p < 0.05$ ,  $p < 0.01$ , and ns, no significance, respectively.
